# Supplementary material
Source: bioRxiv or medRxiv preprint supplement (https://medrxiv.org/highwire/filestream/95750/field_highwire_adjunct_files/0/2020.09.03.20186973-1.pdf)
Supplement: Supplementary file [file 2020.09.03.20186973-1.pdf]

## Supplementary

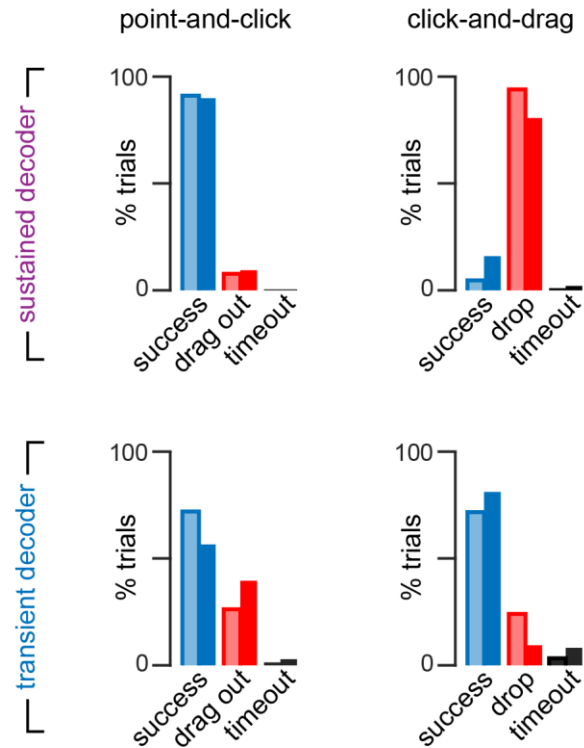

**Figure S1** Outcome distributions for all conditions if early clicks are allowed.

|                                                 | Number of click attempts |    |    |    |    |
|-------------------------------------------------|--------------------------|----|----|----|----|
|                                                 | 1                        | 2  | 3  | 4  | 5+ |
| <b>sustained</b><br>discrete click calibration  | 54%                      | 20 | 11 | 9  | 6  |
| <b>sustained</b><br>sustained click calibration | 11                       | 15 | 13 | 14 | 46 |
| <b>transient</b><br>discrete click calibration  | 80                       | 16 | 3  | 1  | 0  |
| <b>transient</b><br>sustained click calibration | 87                       | 11 | 2  | 1  | 0  |

**Figure S2** Distribution of click attempts on successful point-and-click trials if early clicks are allowed.
